1 **Boundary conditions for early life converge to an organo-**  
2 **sulfur metabolism**

3

4 Joshua E. Goldford<sup>1,2</sup>, Hyman Hartman<sup>3</sup>, Robert Marsland III<sup>2</sup> and Daniel Segrè<sup>1,2,4\*</sup>

5

6 <sup>1</sup>Bioinformatics Program, Boston University, Boston, MA 02215, USA

7 <sup>2</sup>Biological Design Center and Department of Physics, Boston University, Boston, MA 02215,

8 USA

9 <sup>3</sup>Earth, Atmosphere and Planetary Science Department, Massachusetts Institute of Technology,

10 Cambridge, MA 02139, USA

11 <sup>4</sup>Department of Biomedical Engineering, Department of Biology, Boston University, Boston

12 MA, 02215, USA

13 \*Corresponding authors

14 Email: [dsegre@bu.edu](mailto:dsegre@bu.edu)

15

16 **Running Title:** Boundary conditions for early metabolism

17

18 **Keywords:** Metabolism, evolution, network expansion, origin of life, constraint-based

19 **modeling**

20

21

22

23

24

25

26

## 27 **Abstract**

28 It has been suggested that a deep memory of early life is hidden in the architecture of metabolic  
29 networks, whose reactions could have been catalyzed by small molecules or minerals prior to  
30 genetically encoded enzymes (1–6). A major challenge in unraveling these early steps is  
31 assessing the plausibility of a connected, thermodynamically consistent proto-metabolism under  
32 different geochemical conditions, which are still surrounded by high uncertainty. Here we  
33 combine network-based algorithms (9, 10) with physicochemical constraints on chemical  
34 reaction networks to systematically show how different combinations of parameters  
35 (temperature, pH, redox potential and availability of molecular precursors) could have affected  
36 the evolution of a proto-metabolism. Our analysis of possible trajectories indicates that a subset  
37 of boundary conditions converges to an organo-sulfur-based proto-metabolic network fueled by a  
38 thioester- and redox-driven variant of the reductive TCA cycle, capable of producing lipids and  
39 keto acids. Surprisingly, environmental sources of fixed nitrogen and low-potential electron  
40 donors seem not to be necessary for the earliest phases of biochemical evolution. We use one of  
41 these networks to build a steady-state dynamical metabolic model of a proto-cell, and find that  
42 different combinations of carbon sources and electron acceptors can support the continuous  
43 production of a minimal ancient “biomass” composed of putative early biopolymers and fatty  
44 acids.

45

46

47

48

49

50

51

52

53

54

55

56

57  
58 The structure of metabolism carries a memory of its evolutionary history that may date back to  
59 before the onset of an RNA-based genetic system (1–6). Decoding this ancient evolutionary  
60 record could provide important insight into the early stages of life on our planet (2, 5–8), but  
61 constitutes a challenging problem. This challenge is due both to the difficulty of interrogating  
62 complex biochemical networks under different environmental conditions, and to the uncertainty  
63 about these conditions on prebiotic Earth. Estimates of plausible Archean environments that led  
64 to the emergence and evolution of living systems vary dramatically (21, 22), ranging from  
65 alkaline hydrothermal vents driven by chemical gradients (23) to acidic ocean seawater driven by  
66 photochemistry (3, 4). Although geochemical data support the availability of mid-potential  
67 electron donors (H<sub>2</sub>) (24), sulfur (H<sub>2</sub>S) and potentially fixed carbon (25) in ancient environments,  
68 several key molecules used in living systems may have been severely limiting, including a  
69 source of fixed nitrogen (26, 27) (e.g. ammonia), low-potential electron donors (28, 29) and  
70 phosphate (30–32). Rather than assuming a steady supply of these biomolecules, one can  
71 critically revisit the notion that these molecules would have been necessary for the emergence of  
72 ancient proto-metabolic systems. Indeed, we recently used network-based algorithms to ask  
73 whether early metabolism would have required a source of phosphate, and found evidence that  
74 thioesters, rather than phosphate, may have endowed ancient metabolism with key energetic and  
75 biosynthetic capacity (12). This raises the broader question of whether other molecules and  
76 physico-chemical conditions may not be as crucial as previously thought for the emergence of a  
77 proto-metabolism. Understanding these dependencies could also reveal whether specific  
78 components of metabolism are particularly robust or fragile with respect to these initial  
79 conditions.

80  
81 A computational method that can help address these questions is the network expansion  
82 algorithm, which simulates the growth of a biochemical network by iteratively adding to an  
83 initial set of compounds the products of reactions enabled by available substrates, until  
84 convergence (9, 10). This algorithm, in its application to the study of ancient life (11)(12), relies  
85 on three key assumptions: *first*, that chemical reactions successful in early processes were  
86 gradually augmented with new pathways, but never replaced; *second*, that, over long time-scales,  
87 horizontal gene transfer produced abundant shuffling of biochemical reactions across different

88 organisms (19, 20), suggesting that an ecosystem-level approach to metabolism may be  
89 particularly suitable for describing ancient biochemistry; and *third*, that inorganic or small  
90 molecular catalysts (12, 13) could catalyze, in a weaker and less specific manner relative to  
91 modern enzymes, a large number of metabolic reactions, as confirmed by an increasing body of  
92 experimental evidence (14–18).

93

94 In this paper, we systematically explore a combinatorial set of molecules and parameters  
95 associated with possible early Earth environments, and use an enhanced network expansion  
96 algorithm to determine which proto-metabolic networks are thermodynamically reachable under  
97 each of these initial conditions. We further use constraint-based flux balance modeling to  
98 demonstrate the capacity of some of these networks to sustain flux, in a way that resembles  
99 homeostatic growth of present-day cells. Our results suggest that a thioester-driven organic  
100 network may have robustly arisen without phosphate, fixed nitrogen or low-potential electron  
101 donors. This network, by supporting the biosynthesis of keto acids and fatty acids may have  
102 prompted the rise of complex self-sustaining biochemical pathways, marking a key transition  
103 towards the origin of life.

104

105 We first sought to systematically characterize the effect of various geochemical scenarios  
106 on the possible structure of ancient metabolism. Building on prior work (11, 12), we constructed  
107 a model of ancient biosphere-level metabolism based on the KEGG database (33). We first  
108 modified the network (as described in Methods) to account for previously proposed primitive  
109 thioester-coupling and redox reactions (12). For each possible set of environmental parameters  
110 (including temperature, pH and redox potential) we computed the thermodynamic feasibility of  
111 each reaction, and removed infeasible reactions (see Methods). This allowed us to implement a  
112 thermodynamically-constrained network expansion algorithm (12), which iteratively adds  
113 metabolites and thermodynamically-feasible reactions to a network until convergence (see  
114 Methods). We performed thermodynamically-constrained network expansion (see Methods and  
115 Fig. 1A) for  $n=672$  different geochemical scenarios, systematically varying pH, temperature,  
116 redox potential of primitive redox systems, and the availability of key biomolecules including  
117 thiols (that subsequently form thioesters), fixed carbon (formate/acetate) and fixed nitrogen  
118 (ammonia) (Methods, Fig. 1).

119

120           Of the 672 different simulated geochemical scenarios, we found that 288 (43%) expanded  
121 to networks containing over 100 metabolites (Fig. 1B). A logistic regression classifier that uses  
122 geochemical parameters as predictors (see Methods and Fig. 1C) allowed us to quantify the  
123 importance of each environmental parameter in determining whether the expanded network  
124 would reach such a large size. Surprisingly, removing the variable associated with  
125 presence/absence of ammonia did not affect predictive power of the classifier, suggesting that a  
126 source of fixed nitrogen is not an important determinant of the expansion. Consistent with the  
127 relevance of this result to ancient metabolism, we found that the enzymes that catalyze reactions  
128 in the expanded networks before the addition of ammonia were depleted in nitrogen-containing  
129 coenzymes (see Fig. S1C-D, one-tailed Wilcoxon sign rank test:  $P < 10^{-24}$ ) and in active site  
130 amino acids with nitrogeneous side chains (see Fig. SE-F, one-tailed Wilcoxon sign rank test:  $P$   
131  $< 10^{-24}$ ) relative to enzymes added after the addition of ammonia (see Supplemental Text). These  
132 results suggest that ammonia may have not been essential for the initial expansion of  
133 metabolism, and point to a thioester-coupled organo-sulfur metabolic network (Fig. 1) as a core  
134 network that deserves further attention.

135           Beyond the dispensability of nitrogen, the simulations described above revealed a number  
136 of relationships between plausible geochemical scenarios and the structure and size of our  
137 simulated proto-metabolic networks. First, expansion beyond 100 metabolites was feasible in  
138 the absence of a source of fixed carbon, but only when thiols were provided in the seed set,  
139 highlighting the importance for thioester-coupling for ancient carbon fixation pathways (12, 28,  
140 29). The presence of thiols enabled the production of key biomolecules, including fatty acids and  
141 branched chain keto acids (see Fig S2). Second, we explored the effect of the primitive redox  
142 system by systematically varying the reduction potential of the electron donor in the seed set (see  
143 Methods, Fig. 2A). Unexpectedly, we found that as we increased the fixed potential of the  
144 electron donor, expansion to a large network was feasible over a broad range of reduction  
145 potentials (between -150 and 50 mV). Only upon reaching 50mV the expanded network  
146 collapsed to a much smaller solution, suggesting that the generation of low-potential electron  
147 donors from H<sub>2</sub> may not have been a necessary condition for the early expansion of a proto-  
148 metabolism (Fig. 3A). Thus, less stringent constraints, e.g. the presence of mid-potential redox  
149 couples and thioester-forming thiols could have enabled the emergence of an autotrophic proto-

150 metabolic network capable of producing key biomolecules. Notably, both functions can be  
151 potentially carried out by disulfides.

152

153 Analysis of the expanded networks without nitrogen revealed that a large number of  
154 different initial conditions converged to similar expanded organo-sulfur proto-metabolic  
155 networks, spanning variants of key pathways in central carbon metabolism (Fig. 3B). For the  
156 majority of simulations, variants of modern heterotrophic carbon assimilation pathways,  
157 including the glyoxylate cycle and TCA cycle, were highly represented in the network (Fig. 3B).  
158 Several carbon fixation pathways were highly represented in the simulated networks as well: in  
159 over half of the networks that expanded beyond 100 metabolites, we found 92 % (12/13) of the  
160 compounds (or generalized derivatives) that participate in the reductive tricarboxylic acid  
161 (rTCA) cycle, with the exception of phosphoenolpyruvate. We also found that under several  
162 geochemical conditions, all intermediates were producible for three carbon fixation pathways,  
163 including the 3-hydroxypropionate bi-cycle, the hydroxypropionate-hydroxybutylate cycle, and  
164 the dicarboxylate-hydroxybutyrate cycle (Fig. 3A). At-most, only 3 of 9 metabolites used in the  
165 Wood-Ljungdahl (WL) pathway were observed, due to the lack of nitrogen-containing pterins in  
166 the network. This does not necessarily rule out the primordial importance of the WL-pathway, as  
167 its early variants could have been radically different than today's WL-pathway, relying on native  
168 metals to facilitate reduction of CO<sub>2</sub> to acetate (25, 29). In addition to observing a large number  
169 of metabolites used in carbon fixation pathways, we found that a large fraction of the  $\beta$ -oxidation  
170 pathway was represented in our networks, which may have supported the production of fatty  
171 acids in ancient living systems by operating in the reverse direction. Lastly, we observed that the  
172 majority of intermediates involved in the production of branched-chain amino acids were also  
173 producible in the expanded networks.

174

175 A more detailed analysis of the convergent organo-sulfur proto-metabolic network  
176 reveals new possible ancestral metabolic pathways that involve previously unexplored  
177 combinations of reactions and metabolites. Fig. 3B shows a variant of the (r)TCA cycle that is a  
178 component of these expanded networks, and that may have served as the core organo-sulfur  
179 network fueling ancient living systems. Rather than using ATP-dependent reactions found in  
180 extant species (e.g. Succinyl-CoA synthetase and ATP citrate lyase), these reactions are

181 substituted with non-ATP-dependent reaction mechanisms. For instance, the production of a  
182 succinyl-thioester in the extant rTCA cycle relies on Succinyl-CoA synthetase, performing the  
183 following reaction:  $\text{ATP} + \text{Succinate} + \text{CoA} \rightarrow \text{Succinyl-CoA} + \text{ADP} + \text{Pi}$ . However, in the  
184 network presented in Fig. 3B, malyl-thioester, producible through alternative reactions, donates a  
185 thiol to succinate, subsequently forming a succinyl-thioester. This (r)TCA cycle analogue is able  
186 to produce eight keto acids normally serving as key intermediates and precursors to common  
187 amino acids in central carbon metabolism (glyoxylate, pyruvate, oxaloacetate, 2-oxoglutarate  
188 and hydroxypyruvate), as well as a few branched-chain keto acids. Additionally, long-chain  
189 fatty acids like palmitate are producible in this network, driven by thioester and redox-coupling  
190 rather than ATP, like in extant fatty acid biosynthesis. Thus, despite the simplicity of seed  
191 compounds, several small molecular weight keto acids and fatty acids may have been producible  
192 in an organo-sulfur proto-metabolism.

193

194         So far, we have focused only on the topology and global thermodynamic feasibility of  
195 putative ancient metabolic networks. Inspired by recent studies on the molecular budget of  
196 present-day cells, we decided to further explore whether proto-metabolic networks could support  
197 steady state fluxes, and fuel primitive proto-cells with internal energy sources (e.g. thioesters),  
198 redox gradients, and primitive biopolymer capable of catalysis and compartmentalization. Flux  
199 balance analysis (FBA), originally developed for the study of microbial metabolism, enables the  
200 prediction of systems-level properties of metabolic networks at steady-state (34). Fundamentally,  
201 FBA computes possible reaction rates in a network constrained by mass and energy balance,  
202 usually under the assumption that a specific composition of biomolecules is efficiently produced  
203 during a homeostatic growth process. In microbial metabolism, FBA is used to simulate the  
204 production of cellular biomass (e.g. protein, lipids, and nucleic acids) at fixed proportions, which  
205 are derived from known composition of extant cells. We realized that the same approach could  
206 help test the sustainability of a proto-metabolic biochemical system, provided that we could  
207 develop a plausible hypothesis for the “biomass composition” of ancient proto-cells. As a  
208 starting point, we recalled Christian de Duve’s suggestion that the thioester-driven  
209 polymerization of monomers producible from ancient proto-metabolism may have led to  
210 "catalytic multimers," which could have served as catalysts for ancient biochemical reactions (4).  
211 Under nitrogen limited conditions, keto acids producible from proto-metabolism (see Fig. 3B)

212 could have been reduced to  $\alpha$ -hydroxy acids, and polymerized into polyesters using thioesters as  
213 a condensing agent (see Fig. S3). Recent work has suggested that polymers of  $\alpha$ -hydroxy acids  
214 may have been stably produced in geochemical environments (35), and that these molecules  
215 could have served as primitive catalysts (36). These results all point to the intriguing possibility  
216 that the thioester-driven polymerization of  $\alpha$ -hydroxy acids (producible from keto acid  
217 precursors of common amino acids) generated the first metabolically sustainable cache of ancient  
218 catalysts, leading to a collectively autocatalytic protocellular system. We employed FBA to  
219 specifically test the feasibility of such a system. Using an expanded metabolic network as a  
220 scaffold for network reconstruction (Fig. 3B), we constructed a constraint-based model of an  
221 ancient proto-cell using a biomass composition consisting of fatty acids (for proto-cellular  
222 membranes), "catalytic multimers" derived from eight keto acids (Fig. 4B), and redox and  
223 thioester-based free energy sources (Methods, Fig. 4A). We used thermodynamic metabolic flux  
224 analysis (TMFA), a variant of FBA that explicitly considers thermodynamic constraints (37) (see  
225 Methods), to determine whether homeostatic growth of the whole system was achievable. We  
226 found that growth of the proto-cell metabolic model is indeed feasible under a wide variety of  
227 assumptions regarding macromolecular compositions and input molecules (Fig. 4B). Notably,  
228 growth is achievable in simple chemoautotrophic conditions with either  $H_2$  or  $H_2S$ , but not  
229  $Fe(II)$ , as electron donors (Fig. 4B). In this model, thiols and thioesters are not supplied as food  
230 sources, but rather are recycled during steady-state growth of the proto-cell. This reflects the  
231 possibility that thiols could have been initially supplied abiotically, followed by the rapid  
232 takeover of biotic production of mercaptopyruvate, a keto acid that could have been incorporated  
233 into primitive multimers.

234  
235 While most efforts to reconstruct ancient biochemistry have traditionally relied on  
236 building qualitative models of small pathways (2, 4, 5, 7, 38), we found that quantitative  
237 modeling of larger networks can provide substantial new insight into the origin of life. By  
238 computationally mapping geochemical scenarios to plausible ancient proto-metabolic structures,  
239 we estimated which portions of extant biochemistry may have been very sensitive or very robust  
240 to initial geochemical conditions. Our approach reveals that, contrary to expectations (8, 28, 39),  
241 environmental sources of fixed nitrogen and low-potential electron donors may have not been  
242 necessary for early biochemical evolution, and a substantial degree of complexity may have



243 emerged prior to incorporation of nitrogen into the biosphere (3). The key catalytic role played  
244 by nitrogen in the active sites of modern enzymes may have been preceded by positively charged  
245 surfaces or metal ions (18, 25), which could have been replaced by amino/keto acids with  
246 nitrogen side chains once nitrogen became incorporated into proto-metabolism. Our simulations  
247 also cast doubts on the essential role of a low-potential electron donor in early life (8, 28, 29),  
248 consistent with the proposal that low-potential electron donors may not be necessary for  
249 acetogenesis (40), and with the possibility that energy conservation via electron bifurcation  
250 might not have been necessary in primordial metabolism. The independence of our inferred  
251 ancestral networks of low-potential electron donors and ATP, both key substrates for nitrogen  
252 fixation (41), suggests that nitrogen fixation may have evolved later throughout the history of life  
253 (42–44). A striking feature of our analysis is the convergence of multiple geochemical scenarios  
254 towards a core organo-sulfur proto-metabolic network capable of producing various keto acids  
255 and fatty acids (Fig. 3B). This feature provides a window into how thioester-driven  
256 polymerization of  $\alpha$ -hydroxy acid monomers (derived from producible keto acids) could have  
257 added primitive macromolecular organic catalysts (4) to initial inorganic minerals or metal ion  
258 catalysts (18, 25). Further tests of this hypothesis could be pursued by measuring the capacity of  
259 these polymers to catalyze key reactions in the network, and by exploring whether these organic  
260 compounds are produced in living systems today via mechanisms similar to polyketide or non-  
261 ribosomal peptide synthesis. Finally, our constraint-based models of this core organo-sulfur  
262 proto-metabolism provide a first example of how network expansion-based predictions can be  
263 translated into dynamical models, whose capacity to estimate sustainable collective growth can  
264 drive the search for specific self-reproducing chemical networks and metabolically-driven  
265 artificial protocells.

266

## 267 **Acknowledgements**

268 We thank all members of the Segre` Lab for helpful discussions. We acknowledge support by the  
269 Directorates for Biological Sciences (BIO) and Geosciences (GEO) at the NSF and NASA under  
270 Agreements No. 80NSSC17K0295, 80NSSC17K0296 and 1724150 issued through the  
271 Astrobiology Program of the Science Mission Directorate.

## 272 Contributions

273 J.E.G., H.H. and D.S. designed the research. J.E.G. wrote code, ran simulations and performed  
274 analysis. R.M. contributed to the non-equilibrium steady-state modeling. J.G. and D.S. wrote the  
275 manuscript. All authors read and approved the final manuscript.

## 276 Competing Financial Interests

277 The authors declare no competing financial interests.

## 278 Corresponding Authors

279 Correspondence to: [dsegre@bu.edu](mailto:dsegre@bu.edu).

## 280 References

- 281 1. Eck, R. V., and Dayhoff, M. O. (1966) Evolution of the structure of ferredoxin based on  
282 living relics of primitive amino Acid sequences. *Science*. **152**, 363–366
- 283 2. Hartman, H. (1975) Speculations on the origin and evolution of metabolism. *J. Mol. Evol.*  
284 **4**, 359–370
- 285 3. Hartman, H. (1992) Conjectures and reveries. *Photosynth. Res.* **33**, 171–6
- 286 4. de Duve, C. (1991) *Blueprint for a cell: the nature and origin of life*, Neil Patterson  
287 Publishers, Carolina Biological Supply Company, Burlington, N.C.
- 288 5. Morowitz, H. J., Kostelnik, J. D., Yang, J., and Cody, G. D. (2000) The origin of  
289 intermediary metabolism. *Proc. Natl. Acad. Sci. U. S. A.* **97**, 7704–8
- 290 6. Smith, E., and Morowitz, H. J. (2016) *The Origin and Nature of Life On Earth*, 1st Ed.,  
291 Cambridge University Press, Cambridge, United Kingdom, 10.1017/CBO9781316348772
- 292 7. Smith, E., and Morowitz, H. J. (2004) Universality in intermediary metabolism. *Proc.*  
293 *Natl. Acad. Sci. U. S. A.* **101**, 13168–73
- 294 8. Sousa, F. L., Thiergart, T., Landan, G., Nelson-Sathi, S., Pereira, I. a C., Allen, J. F., Lane,  
295 N., and Martin, W. F. (2013) Early bioenergetic evolution. *Philos. Trans. R. Soc. Lond. B.*  
296 *Biol. Sci.* **368**, 20130088
- 297 9. Ebenhöh, O., Handorf, T., and Heinrich, R. (2004) Structural analysis of expanding  
298 metabolic networks. *Genome Inform.* **15**, 35–45

- 299 10. Handorf, T., Ebenhöf, O., and Heinrich, R. (2005) Expanding metabolic networks: scopes  
300 of compounds, robustness, and evolution. *J. Mol. Evol.* **61**, 498–512
- 301 11. Raymond, J., and Segrè, D. (2006) The effect of oxygen on biochemical networks and the  
302 evolution of complex life. *Science.* **311**, 1764–7
- 303 12. Goldford, J. E., Hartman, H., Smith, T. F., and Segrè, D. (2017) Remnants of an Ancient  
304 Metabolism without Phosphate. *Cell.* **168**, 1126–1134.e9
- 305 13. Goldford, J. E., and Segrè, D. (2018) Modern views of ancient metabolic networks. *Curr.*  
306 *Opin. Syst. Biol.* **8**, 117–124
- 307 14. Keller, M. A., Zylstra, A., Castro, C., Turchyn, A. V., Griffin, J. L., and Ralser, M. (2016)  
308 Conditional iron and pH-dependent activity of a non-enzymatic glycolysis and pentose  
309 phosphate pathway. *Sci. Adv.* **2**, e1501235
- 310 15. Keller, M. A., Turchyn, A. V., and Ralser, M. (2014) Non-enzymatic glycolysis and  
311 pentose phosphate pathway-like reactions in a plausible Archean ocean. *Mol. Syst. Biol.*  
312 **10**, 725
- 313 16. Messner, C. B., Driscoll, P. C., Piedrafita, G., De Volder, M. F. L., and Ralser, M. (2017)  
314 Nonenzymatic gluconeogenesis-like formation of fructose 1,6-bisphosphate in ice. *Proc.*  
315 *Natl. Acad. Sci.* **114**, 7403–7407
- 316 17. Keller, M. A., Piedrafita, G., and Ralser, M. (2015) The widespread role of non-enzymatic  
317 reactions in cellular metabolism. *Curr. Opin. Biotechnol.* **34**, 153–161
- 318 18. Muchowska, K. B., Varma, S. J., Chevallot-Beroux, E., Lethuillier-Karl, L., Li, G., and  
319 Moran, J. (2017) Metals promote sequences of the reverse Krebs cycle. *Nat. Ecol. Evol.* **1**,  
320 1716–1721
- 321 19. Vetsigian, K., Woese, C., and Goldenfeld, N. (2006) Collective evolution and the genetic  
322 code. *Proc. Natl. Acad. Sci. U. S. A.* **103**, 10696–701
- 323 20. Ochman, H., Lawrence, J. G., and Groisman, E. A. (2000) Lateral gene transfer and the  
324 nature of bacterial innovation. *Nature.* **405**, 299–304
- 325 21. Lazcano, A., and Miller, S. L. (1996) The origin and early evolution of life: prebiotic  
326 chemistry, the pre-RNA world, and time. *Cell.* **85**, 793–8
- 327 22. Deamer, D., and Weber, A. L. (2010) Bioenergetics and life’s origins. *Cold Spring Harb.*  
328 *Perspect. Biol.* **2**, a004929
- 329 23. Martin, W., Baross, J., Kelley, D., and Russell, M. J. (2008) Hydrothermal vents and the  
330 origin of life. *Nat. Rev. Microbiol.* **6**, 805–14
- 331 24. Russell, M. J., Hall, A. J., and Martin, W. (2010) Serpentinization as a source of energy at  
332 the origin of life. *Geobiology.* **8**, 355–71
- 333 25. Varma, S. J., Muchowska, K. B., Chatelain, P., and Moran, J. (2018) Native iron reduces  
334 CO<sub>2</sub> to intermediates and end-products of the acetyl-CoA pathway. *Nat. Ecol. Evol.*

- 335 10.1038/s41559-018-0542-2
- 336 26. Dörr, M., Kässbohrer, J., Grunert, R., Kreisel, G., Brand, W. A., Werner, R. A., Geilmann,  
337 H., Apfel, C., Robl, C., and Weigand, W. (2003) A possible prebiotic formation of  
338 ammonia from dinitrogen on iron sulfide surfaces. *Angew. Chem. Int. Ed. Engl.* **42**, 1540–  
339 3
- 340 27. Navarro-González, R., McKay, C. P., and Mvondo, D. N. (2001) A possible nitrogen  
341 crisis for Archaean life due to reduced nitrogen fixation by lightning. *Nature.* **412**, 61–64
- 342 28. Martin, W. F., and Thauer, R. K. (2017) Energy in Ancient Metabolism. *Cell.* **168**, 953–  
343 955
- 344 29. Sousa, F. L., Preiner, M., and Martin, W. F. (2018) Native metals, electron bifurcation,  
345 and CO<sub>2</sub> reduction in early biochemical evolution. *Curr. Opin. Microbiol.* **43**, 77–83
- 346 30. Halmann, M. (1974) Evolution and Ecology of Phosphorus Metabolism. in *The Origin of*  
347 *Life and Evolutionary Biochemistry* (Dose, K., Fox, S. W., Deborin, G. A., and  
348 Pavlovskaya, T. E. eds), pp. 169–182, Springer US
- 349 31. Schwartz, A. W. (2006) Phosphorus in prebiotic chemistry. *Philos. Trans. R. Soc. Lond.*  
350 *B. Biol. Sci.* **361**, 1743–9
- 351 32. Keefe, A. D., and Miller, S. L. (1995) Are polyphosphates or phosphate esters prebiotic  
352 reagents? *J. Mol. Evol.* **41**, 693–702
- 353 33. Kanehisa, M., and Goto, S. (2000) KEGG: kyoto encyclopedia of genes and genomes.  
354 *Nucleic Acids Res.* **28**, 27–30
- 355 34. Orth, J. D., Thiele, I., and Palsson, B. O. (2010) What is flux balance analysis? *Nat*  
356 *Biotech.* **28**, 245–248
- 357 35. Chandru, K., Guttenberg, N., Giri, C., Hongo, Y., Butch, C., Mamajanov, I., and Cleaves,  
358 H. J. (2018) Simple prebiotic synthesis of high diversity dynamic combinatorial polyester  
359 libraries. *Commun. Chem.* **1**, 30
- 360 36. Forsythe, J. G., Yu, S. S., Mamajanov, I., Grover, M. A., Krishnamurthy, R., Fernández,  
361 F. M., and Hud, N. V. (2015) Ester-Mediated Amide Bond Formation Driven by Wet-Dry  
362 Cycles: A Possible Path to Polypeptides on the Prebiotic Earth. *Angew. Chemie - Int. Ed.*  
363 **54**, 9871–9875
- 364 37. Henry, C. S., Broadbelt, L. J., and Hatzimanikatis, V. (2007) Thermodynamics-based  
365 metabolic flux analysis. *Biophys. J.* **92**, 1792–1805
- 366 38. Wächtershäuser, G. (1990) Evolution of the first metabolic cycles. *Proc. Natl. Acad. Sci.*  
367 **87**, 200–204
- 368 39. Martin, W., and Russell, M. J. (2007) On the origin of biochemistry at an alkaline  
369 hydrothermal vent. *Philos. Trans. R. Soc. London B Biol. Sci.* **362**, 1887–1926
- 370 40. Bar-Even, A. (2013) Does acetogenesis really require especially low reduction potential?

- 371 *Biochim. Biophys. Acta.* **1827**, 395–400
- 372 41. Duval, S., Danyal, K., Shaw, S., Lytle, A. K., Dean, D. R., Hoffman, B. M., Antony, E.,  
373 and Seefeldt, L. C. (2013) Electron transfer precedes ATP hydrolysis during nitrogenase  
374 catalysis. *Proc. Natl. Acad. Sci.* **110**, 16414–16419
- 375 42. Weiss, M. C., Sousa, F. L., Mrnjavac, N., Neukirchen, S., Roettger, M., Nelson-sathi, S.,  
376 and Martin, W. F. (2016) The physiology and habitat of the last universal common  
377 ancestor. *Nat. Microbiol.* **1**, 1–8
- 378 43. Gogarten, J. P., and Deamer, D. (2016) Is LUCA a thermophilic progenote? *Nat.*  
379 *Microbiol.* **1**, 16229
- 380 44. Weiss, M. C., Neukirchen, S., Roettger, M., Mrnjavac, N., Nelson-Sathi, S., Martin, W.  
381 F., and Sousa, F. L. (2016) Reply to “Is LUCA a thermophilic progenote?” *Nat.*  
382 *Microbiol.* **1**, 16230
- 383 45. Mall, A., Sobotta, J., Huber, C., Tschirner, C., Kowarschik, S., Bačnik, K., Mergelsberg,  
384 M., Boll, M., Hügler, M., Eisenreich, W., and Berg, I. A. (2018) Reversibility of citrate  
385 synthase allows autotrophic growth of a thermophilic bacterium. *Science (80-. ).* **359**,  
386 563–567
- 387 46. Nunoura, T., Chikaraishi, Y., Izaki, R., Suwa, T., Sato, T., Harada, T., Mori, K., Kato, Y.,  
388 Miyazaki, M., Shimamura, S., Yanagawa, K., Shuto, A., Ohkouchi, N., Fujita, N., Takaki,  
389 Y., Atomi, H., and Takai, K. (2018) A primordial and reversible TCA cycle in a  
390 facultatively chemolithoautotrophic thermophile. *Science (80-. ).* **359**, 559–563
- 391

392 **Figures**

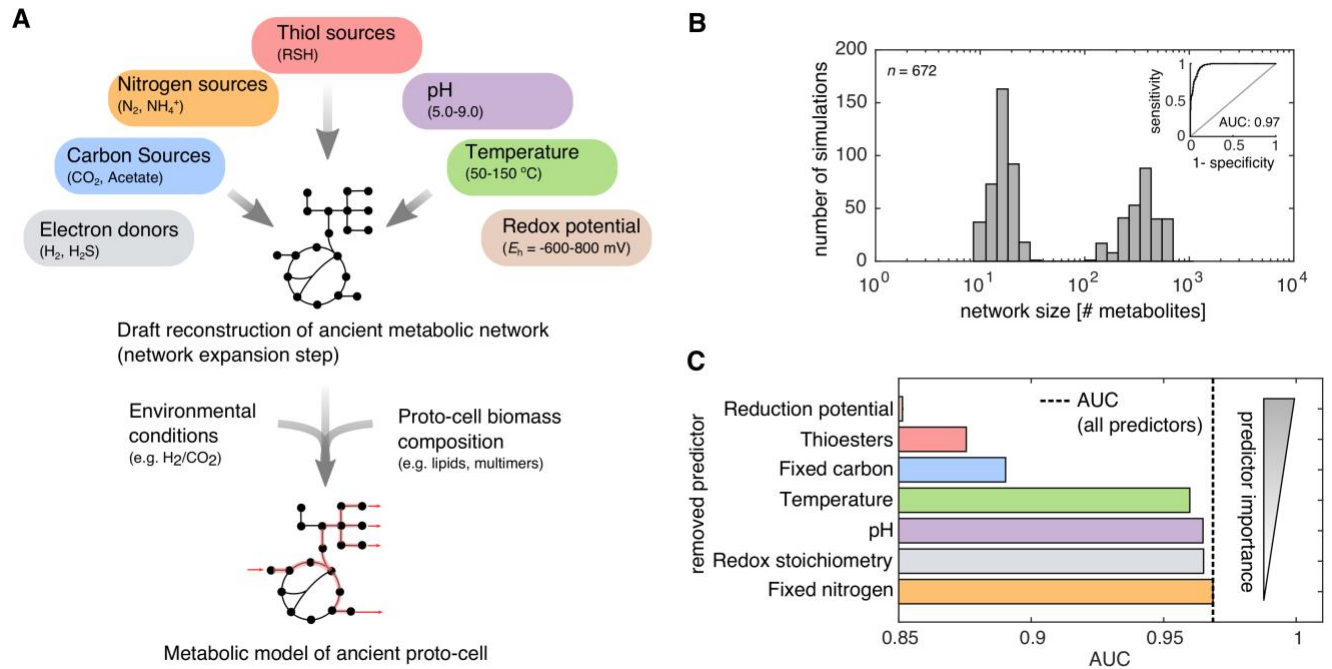

393

394 **Figure 1: Nitrogen is not essential for the initial expansion of metabolism.** (A) A  
 395 thermodynamically-constrained network expansion algorithm was used to simulate the early  
 396 expansion of metabolism under 672 scenarios, systematically varying the availability of  
 397 reductants in the environment, pH, carbon sources, the presence of thiols, temperature and the  
 398 availability of ammonia. (B) A histogram of network sizes (*x*-axis, number of metabolites)  
 399 revealed that 43 % (288/672) of the scenarios resulted a bimodal distribution, where expansion  
 400 occurred beyond 100 metabolites. (inset) A logistic regression classifier was constructed to  
 401 predict whether a geochemical scenario resulted in a network that exceeded 100 metabolites, and  
 402 a receiver operating curve (ROC) was plotted. The trained classifier resulted in an area under the  
 403 curve (AUC) of 0.97 and leave-one out cross-validation accuracy of 0.89. (C) Models were  
 404 trained without information on specific geochemical variables (*y*-axis), and the ensuing AUC  
 405 was plotted as a bar-chart (*x*-axis), revealing that knowledge of the availability of fixed nitrogen  
 406 offers no information on whether networks expanded.

407

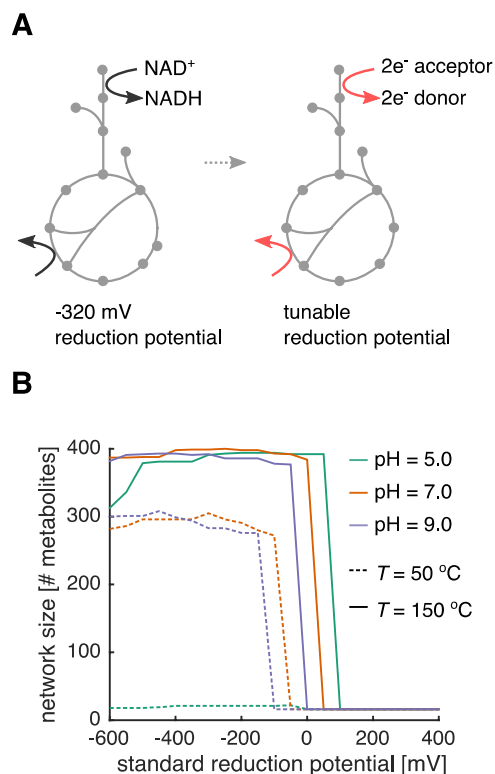

408 **Figure 2: Reduction potential of nicotinamide and flavin substitutes influences network**  
409 **expansion.** (A) Redox coenzymes (NAD, NADP, and FAD) were substituted with an arbitrary  
410 electron donor/acceptor at a fixed reduction potential. (B) We performed thermodynamic  
411 network expansion in acidic (pH 5), neutral (pH 7) and alkaline (pH 9) conditions at two  
412 temperatures ( $T=50$  and  $150$  °C), using a two-electron redox couple at a fixed potential ( $x$ -axis)  
413 as a substitute for NAD(P)/FAD coupling in extant metabolic reactions (see Methods). We  
414 plotted the final network size across all pH and temperatures with no fixed carbon sources (e.g.  
415 only  $\text{CO}_2$ ) and thiols. Notably, for these simulations, we used a base seed set of:  $\text{H}_2$ ,  $\text{H}_2\text{S}$ ,  $\text{H}_2\text{O}$ ,  
416  $\text{HCO}_3^-$ ,  $\text{H}^+$  and  $\text{CO}_2$ .

417

418

419

420

421

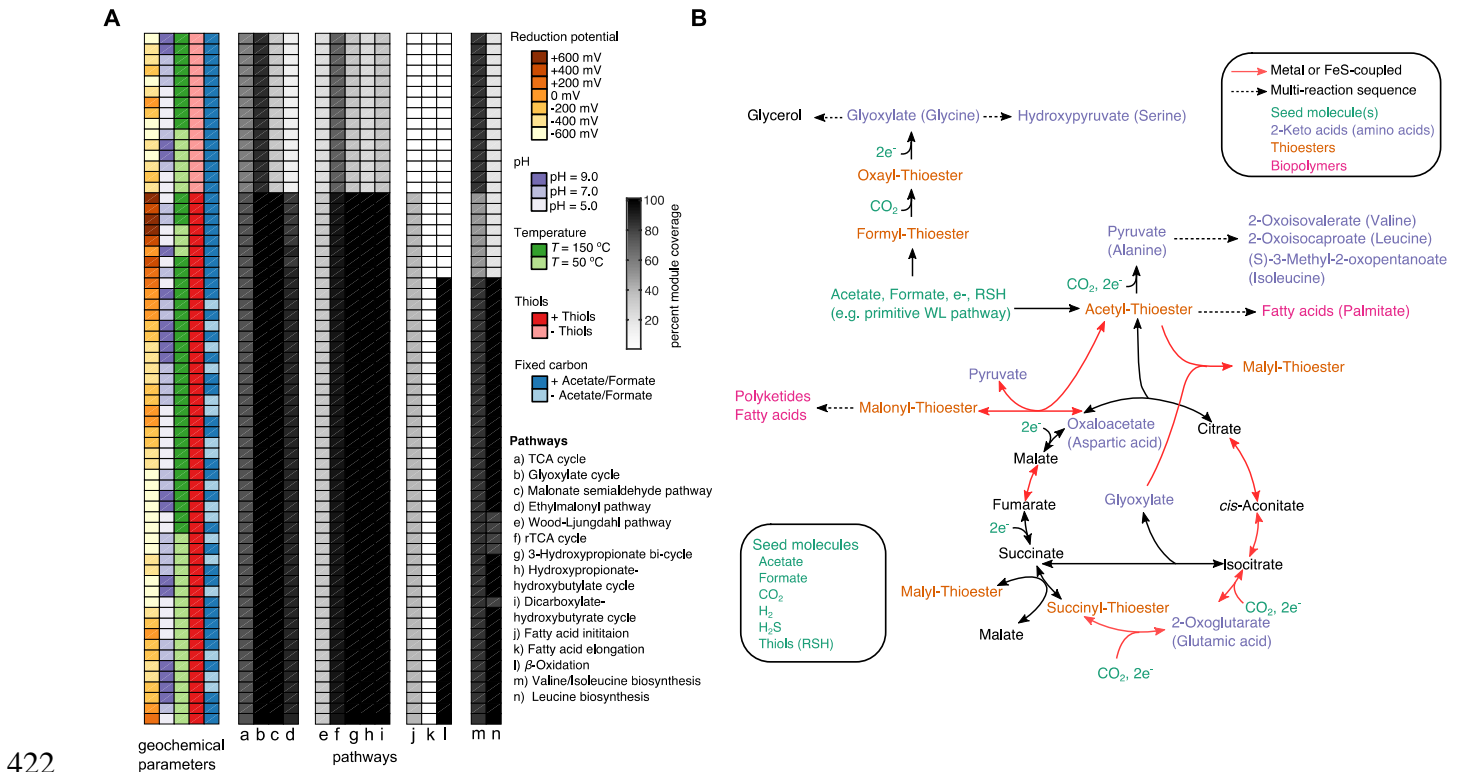

422

423 **Figure 3: Systematic exploration of prebiotic scenarios reveals a core organo-sulfur**  
 424 **network.** (A) A thermodynamically constrained network expansion algorithm was used to  
 425 simulate the early expansion of proto-metabolism under various scenarios, including the  
 426 availability of reductants in the environment, pH, temperature, and the availability of fixed  
 427 carbon sources and thiols. The proportion of molecules selected KEGG modules involved carbon  
 428 metabolism are plotted as a heatmap to the right of the parameters. (B) A representation of the  
 429 core network producible from a prebiotically plausible seed set without nitrogen or phosphate  
 430 (bottom left box). Acetyl-thioesters are first produced, potentially from a primitive Wood-  
 431 Ljungdahl pathway (8, 25) from acetate and thiols provided as seed molecules (green). Acetyl-  
 432 thioesters enable the production of all intermediates in the reductive tricarboxylic acid (rTCA)  
 433 cycle, with the exception of phosphoenolpyruvate. ATP-dependent reactions in the rTCA cycle  
 434 may have been substituted with a primitive malate synthase and transthioesterification of  
 435 succinate as well as the recently discovered reversible citrate synthase (45, 46). The keto acid  
 436 precursors for 8 common amino acids (A,D,E,G,I,L,S,V) are highlighted in purple, while routes  
 437 to thioester-mediated polymerization of fatty acids and polyketides are highlighted in pink.

438



439

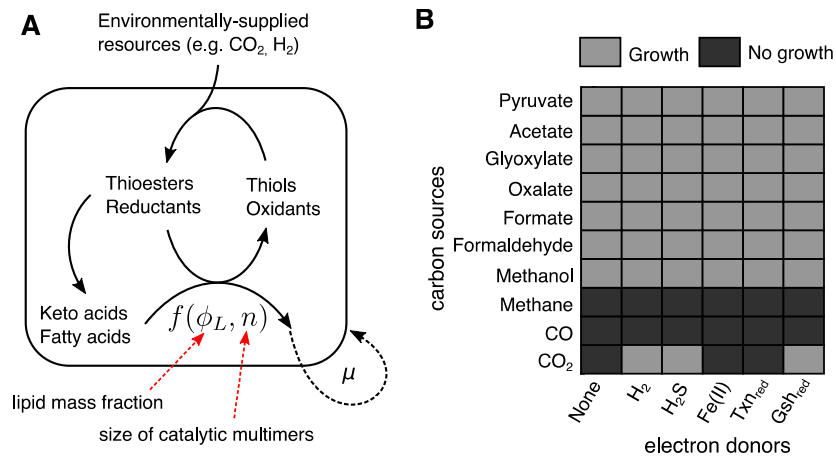

440

441 **Figure 4: Constraint-based modeling of plausible ancient proto-cells.** (A) We constructed a  
 442 metabolic model of a plausible ancient proto-cell and used thermodynamic metabolic flux  
 443 analysis (37) to simulate the maximum growth yields, steady-state fluxes, and metabolite  
 444 concentrations under a variety of environmental conditions. The metabolic model was  
 445 constructed using internally-generated reductants and thioesters that fueled biomass formation.  
 446 The biomass composition was specified as variable fractions of fatty acids, and polymerized  
 447 hydroxyacids from keto-acid precursors (see Methods). In this model, the internal redox  
 448 coenzyme was assumed to be disulfide/dithiol at a standard reduction potential of -220 mV, and  
 449 the production of biomass was fueled by the hydrolysis of acetyl-thioesters. We parameterized  
 450 the biomass composition using a two-parameter model (see Methods), with the mass fraction of  
 451 lipids in the proto-cell set to  $\phi_L = 0.2$ , and the average size of a catalytic multimer,  $n = 10$ . (B)  
 452 We simulated growth on a variety of simple carbon sources (y-axis) and electron donors (x-axis),  
 453 and show environments supporting non-zero growth (light grey) or no growth (dark grey).  
 454 Interestingly, H<sub>2</sub>, H<sub>2</sub>S and glutathione were the only reductants capable of supporting fully  
 455 autotrophic growth on CO<sub>2</sub>. Furthermore, CO and Methane could not support growth in this  
 456 model, while other one-carbon sources like methanol, formate and formaldehyde could support  
 457 biomass growth.
